# Supplementary material for: Accessibility and Acceptability of Infectious Disease Interventions Among Migrants in the EU/EEA: A CERQual Systematic Review
Source: PubMed Central journal article supplement (PMC6267477; doi:10.3390/ijerph15112329), 2018-10-23
Supplement: ijerph-15-02329-s001.pdf [file ijerph-15-02329-s001.pdf]

- 1 exp "Emigrants and Immigrants"/ (7985)
- 2 (emigra\$ or immigra\$ or migrant\$ or migration\$ or newcomer\$ or refugee\$).mp. (228210)
- 3 (asylum adj2 (seek\$ or sought)).tw. (969)
- 4 (displaced adj2 (people or person?)).tw. (570)
- 5 or/1-4 (228418)
- 6 Health Services Accessibility/ (58905)
- 7 Health Equity/ (98)
- 8 ((availab\$ or access\$ or barrier\$ or equit\$) adj3 (care or health\$)).mp. (90405)
- 9 "Patient Acceptance of Health Care"/ (35583)
- 10 exp Patient Satisfaction/ (70835)
- 11 ((consumer? or patient?) adj3 (accept\$ or attitud\$ or satisf\$) adj3 (care or health or healthcare)).mp. (39311)
- 12 or/6-11 (188999)
- 13 exp Communicable Diseases/ (30347)
- 14 (infectious adj2 disease?).mp. (86383)
- 15 ((communicable or contagious or transmissible) adj2 (disease? or infection?)).mp. (54011)
- 16 or/13-15 (128068)
- 17 exp Hepatitis B/ (50672)
- 18 (CHB or HBV or HepB).mp. (32209)
- 19 ((hep or hepatitis) adj3 B).mp. (82837)
- 20 hbsag.tw. (16167)
- 21 (hbs adj2 ag).tw. (721)

22 hb-s-ag.tw. (24)  
23 ((serum or type b) adj2 hepatitis).mp. (3435)  
24 or/17-23 [Hep B] (86842)  
25 exp Hepatitis C/ (53765)  
26 (CHC or HCV or HepC).mp. (44016)  
27 ((hep or hepatitis) adj3 C).mp. (71676)  
28 or/25-27 [Hep C] (75877)  
29 (hiv or hiv1\$ or hiv2\$).mp. (284241)  
30 (human adj (immunodeficienc\$ or immune deficienc\$ or  
immunodeficienc\$ or immuno deficienc\$)).mp. (82014)  
31 Acquired Immunodeficiency Syndrome/ (74557)  
32 (acquired adj (immunodeficienc\$ or immune deficienc\$ or  
immunodeficienc\$ or immuno deficienc\$)).mp. (88461)  
33 aids.hw. (60564)  
34 (aids adj2 (infect\$ or virus\$)).mp. (6042)  
35 or/29-34 [hiv] (356227)  
36 exp Schistosoma/ (15807)  
37 bilharzia\$.tw. (2438)  
38 exp Schistosomiasis/ (21713)  
39 schistosom\$.mp. (30488)  
40 katayama fever\$.tw. (30)  
41 Strongyloides/ (995)  
42 Strongyloides stercoralis/ (1072)  
43 Strongyloidiasis/ (3337)  
44 strongyloid\$.mp. (5559)  
45 or/36-44 [IP] (35821)

46 Tuberculosis/ (97611)  
47 tuberculo\$.mp. (220149)  
48 tb.tw. (29844)  
49 ltbi.tw. (1123)  
50 or/46-49 [TB] (226741)  
51 exp Measles/ (14334)  
52 exp Measles virus/ (6143)  
53 measles.mp. (23714)  
54 (rubeola or rubeolla).tw. (305)  
55 Mumps/ (4253)  
56 Mumps virus/ (1974)  
57 mumps.mp. (9610)  
58 ((epidemic or infectious) adj parotiti\$).tw. (395)  
59 exp Rubella/ (7779)  
60 Rubella virus/ (3332)  
61 rubella?.mp. (13919)  
62 german measles.tw. (204)  
63 mmr.mp. (5350)  
64 exp Poliomyelitis/ (19326)  
65 Poliovirus/ (9420)  
66 polio\$.mp. (32504)  
67 Tetanus/ (9191)  
68 tetanus.mp. (25655)  
69 Diphtheria/ (6558)  
70 Diphtheria toxin/ (3381)

71 diphtheria?.mp. (18767)  
72 (dtp or dtap or tdap).tw. (2063)  
73 Whooping Cough/ (7628)  
74 whooping cough.mp. (8271)  
75 Bordetella pertussis/ (4818)  
76 pertuss\$.mp. (27187)  
77 Meningitis, Haemophilus/ (2410)  
78 Haemophilus influenzae/ (12024)  
79 Haemophilus influenzae type b/ (1061)  
80 ((haemophilus or hemophilus) adj influenzae).mp. (19828)  
81 "h. influenzae".tw. (5962)  
82 hib.tw. (2616)  
83 or/51-82 [Vacc] (148344)  
84 12 or 16 or 24 or 28 or 35 or 45 or 50 or 83 (1130618)  
85 meta analysis.mp,pt. (99896)  
86 review.pt. (2085646)  
87 search\$.tw. (268070)  
88 or/85-87 (2278940)  
89 5 and 84 and 88 (1972)  
90 animals/ not (humans/ and animals/) (4249861)  
91 89 not 90 (1921)  
92 (2010\$ or 2011\$ or 2012\$ or 2013\$ or 2014\$ or 2015\$ or  
2016\$).em. (5392589)  
93 91 and 92 (769)  
94 remove duplicates from 93 (741)

\*\*\*\*\*

Database: Embase <1974 to 2016 July 28>  
Search Date: 29 July 2016

---

- 1 exp migrant/ (23718)
- 2 (emigra\$ or immigra\$ or migrant\$ or migration\$ or newcomer\$ or refugee\$).mp. (348985)
- 3 (asylum adj2 (seek\$ or sought)).tw. (1254)
- 4 (displaced adj2 (people or person?)).tw. (686)
- 5 or/1-4 (349482)
- 6 health care access/ (44591)
- 7 ((availab\$ or access\$ or barrier\$ or equit\$) adj3 (care or health\$)).mp. (104999)
- 8 exp patient attitude/ (302067)
- 9 ((consumer? or patient?) adj3 (accept\$ or attitud\$ or satisf\$) adj3 (care or health or healthcare)).mp. (5925)
- 10 or/6-9 (399274)
- 11 communicable disease/ (19379)
- 12 (infectious adj2 disease?).mp. (94520)
- 13 ((communicable or contagious or transmissible) adj2 (disease? or infection?)).mp. (33572)
- 14 or/11-13 (121783)
- 15 exp hepatitis B/ (80896)
- 16 (CHB or HBV or HepB).tw. (54027)
- 17 ((hep or hepatitis) adj3 B).tw. (92522)
- 18 hbsag.tw. (24478)
- 19 (hbs adj2 ag).tw. (1141)
- 20 hb-s-ag.tw. (626)
- 21 ((serum or type b) adj2 hepatitis).tw. (4229)

22 or/15-21 [Hep B] (129168)  
23 exp hepatitis C/ (88369)  
24 (CHC or HCV or HepC).tw. (76347)  
25 ((hep or hepatitis) adj3 C).tw. (93306)  
26 or/23-25 [Hep C] (131347)  
27 (hiv or hiv1\$ or hiv2\$).mp. (320981)  
28 exp human immunodeficiency virus infection/ (326876)  
29 exp human immunodeficiency virus/ (159417)  
30 (human adj (immunodeficienc\$ or immune deficienc\$ or  
immunodeficienc\$ or immuno deficienc\$)).tw. (82582)  
31 (acquired adj (immunodeficienc\$ or immune deficienc\$ or  
immunodeficienc\$ or immuno deficienc\$)).tw. (22410)  
32 aids.hw. (11242)  
33 (aids adj2 (infect\$ or virus\$)).tw. (6854)  
34 or/27-33 [hiv] (455619)  
35 exp schistosoma/ (21829)  
36 bilharzia\$.tw. (2496)  
37 exp schistosomiasis/ (22106)  
38 schistosom\$.tw. (29237)  
39 katayama fever\$.tw. (42)  
40 strongyloides/ (1248)  
41 strongyloides stercoralis/ (2473)  
42 strongyloidiasis/ (4019)  
43 strongyloid\$.tw. (5024)  
44 or/35-43 [IP] (42644)  
45 tuberculosis/ (116934)

46 tuberculo\$.tw. (208521)  
47 tb.tw. (46163)  
48 ltbi.tw. (1971)  
49 or/45-48 [TB] (253812)  
50 measles/ (18067)  
51 measles virus/ (8427)  
52 measles.tw. (22452)  
53 (rubeola or rubeolla).tw. (377)  
54 mumps/ (7075)  
55 mumps virus/ (2392)  
56 mumps.tw. (8159)  
57 ((epidemic or infectious) adj parotiti\$).tw. (395)  
58 rubella/ (10692)  
59 rubella virus/ (4553)  
60 rubella?.tw. (12936)  
61 german measles.tw. (263)  
62 mmr.tw. (9055)  
63 poliomyelitis/ (21756)  
64 exp poliomyelitis virus/ (9786)  
65 polio\$.mp. (39999)  
66 tetanus/ (14535)  
67 tetanus.tw. (23217)  
68 diphtheria/ (10792)  
69 diphtheria toxin/ (4666)  
70 diphtheria?.tw. (15223)

71 (dtp or dtap or tdap).tw. (2887)  
72 pertussis/ (12247)  
73 pertuss\$.tw. (27104)  
74 whooping cough.tw. (3269)  
75 haemophilus meningitis/ (385)  
76 exp haemophilus influenzae/ (26827)  
77 ((haemophilus or hemophilus) adj influenzae).tw. (19221)  
78 "h. influenzae".tw. (7325)  
79 hib.tw. (3362)  
80 or/50-79 [Vacc] (180188)  
81 10 or 14 or 22 or 26 or 34 or 44 or 49 or 80 (1532838)  
82 meta analys\$.mp. (176722)  
83 search\$.tw. (381239)  
84 review.pt. (2187317)  
85 or/82-84 (2546877)  
86 5 and 81 and 85 (3301)  
87 (exp animal/ or animal.hw. or nonhuman/) not (exp human/ or human cell/ or (human or humans).ti.) (5909424)  
88 86 not 87 (3149)  
89 (2010\$ or 2011\$ or 2012\$ or 2013\$ or 2014\$ or 2015\$ or 2016\$).dd. (9919671)  
90 88 and 89 (1426)  
91 remove duplicates from 90 (1392)

\*\*\*\*\*

Databases: Database of Abstracts of Reviews of Effects (DARE) and  
Cochrane Database of Systematic Reviews (CDSR) and NHS EED  
Search Date: 29 July 2016



-----  
-----

| ID  | Search                                                                                               |
|-----|------------------------------------------------------------------------------------------------------|
| #1  | MeSH descriptor: [Emigrants and Immigrants] explode all trees                                        |
| #2  | MeSH descriptor: [Transients and Migrants] explode all trees                                         |
| #3  | (emigra* or immigra* or migrant* or migration* or newcomer* or refugee*)                             |
| #4  | asylum near/2 (seek* or sought)                                                                      |
| #5  | displaced near/2 (people or person*)                                                                 |
| #6  | {or #1-#5}                                                                                           |
| #7  | MeSH descriptor: [Health Services Accessibility] this term only                                      |
| #8  | MeSH descriptor: [Health Equity] this term only                                                      |
| #9  | (availab* or access* or barrier* or equit*) near/3 (care or health*)                                 |
| #10 | MeSH descriptor: [Patient Acceptance of Health Care] this term only                                  |
| #11 | MeSH descriptor: [Patient Satisfaction] explode all trees                                            |
| #12 | (consumer* or patient*) adj3 (accept* or attitud* or satisf*) near/3 (care or health or healthcare)  |
| #13 | {or #7-#12}                                                                                          |
| #14 | MeSH descriptor: [Communicable Diseases] explode all trees                                           |
| #15 | infectious near/2 disease*                                                                           |
| #16 | (communicable or contagious or transmissible) near/2 (disease* or infection*)                        |
| #17 | {or #14-#16}                                                                                         |
| #18 | MeSH descriptor: [Hepatitis B] explode all trees                                                     |
| #19 | (CHB or HBV or HepB)                                                                                 |
| #20 | (hep or hepatitis) near/3 B                                                                          |
| #21 | hbsag:ti,ab                                                                                          |
| #22 | hbs near/2 ag:ti,ab                                                                                  |
| #23 | hb-s-ag:ti,ab                                                                                        |
| #24 | (serum or type b) near/2 hepatitis:ti,ab                                                             |
| #25 | {or #18-#24}                                                                                         |
| #26 | MeSH descriptor: [Hepatitis C] explode all trees                                                     |
| #27 | (CHC or HCV or HepC)                                                                                 |
| #28 | (hep or hepatitis) near/3 C                                                                          |
| #29 | {or #26-#28}                                                                                         |
| #30 | (hiv or hiv1* or hiv2*)                                                                              |
| #31 | human next (immunodeficienc* or immune deficienc* or immunodeficienc* or immuno deficienc*):ti,ab    |
| #32 | MeSH descriptor: [Acquired Immunodeficiency Syndrome] this term only                                 |
| #33 | acquired next (immunodeficienc* or immune deficienc* or immunodeficienc* or immuno deficienc*):ti,ab |
| #34 | aids:kw                                                                                              |
| #35 | aids near/2 (infect* or virus*):ti,ab                                                                |
| #36 | {or #30-#35}                                                                                         |
| #37 | MeSH descriptor: [Schistosoma] explode all trees                                                     |

#38 bilharzia\*  
 #39 MeSH descriptor: [Schistosomiasis] explode all trees  
 #40 schistosom\*  
 #41 katayama fever  
 #42 MeSH descriptor: [Strongyloides] this term only  
 #43 MeSH descriptor: [Strongyloides stercoralis] this term only  
 #44 MeSH descriptor: [Strongyloides] this term only  
 #45 strongyloid\*  
 #46 {or #37-#45}  
 #47 MeSH descriptor: [Tuberculosis] this term only  
 #48 tuberculo\*  
 #49 tb:ti,ab  
 #50 ltbi:ti,ab  
 #51 {or #47-#50}  
 #52 (measles or rubeola or rubeolla)  
 #53 (mumps or epidemic parotiti\* or infectious parotiti\*)  
 #54 (rubella\* or german measles)  
 #55 mmr  
 #56 polio\*  
 #57 tetanus  
 #58 (diphtheria\* or dtp or dtap or tdap)  
 #59 (pertuss\* or whooping cough)  
 #60 (haemophilus meningitis or hemophilus meningitis)  
 #61 (haemophilus influenzae or (hemophilus influenzae))  
 #62 h. influenzae  
 #63 hib  
 #64 {or #52-#63}  
 #65 #13 or #17 or #25 or #29 or #36 or #46 or #51 or #64  
 #66 #6 and #65  
 #67 #66 in Cochrane Reviews (Reviews and Protocols)  
 #68 #66 in Other Reviews

\*\*\*\*\*

Database: EBSCO CINAHL <1970 to July 2016>  
 Search Date: 29 July 2016

| #   | Query                                                                     | Limiters/Expanders                 | Last Run Via | Results |
|-----|---------------------------------------------------------------------------|------------------------------------|--------------|---------|
| S70 | S66 AND S69                                                               | Limiters - Exclude MEDLINE records | 77           |         |
| S69 | S67 OR S68                                                                |                                    | 1,407,771    |         |
| S68 | EM 2010 or EM 2011 or EM 2012 or EM 2013 or EM 2014 or EM 2015 or EM 2016 |                                    | 1,313,069    |         |
| S67 | PY 2010 or PY 2011 or PY 2012 or PY 2013 or PY 2014 or PY 2015 or PY 2016 |                                    | 1,312,169    |         |
| S66 | (S5 AND S60 AND S65)                                                      |                                    | 522          |         |
| S65 | S61 OR S62 OR S63 OR S64                                                  |                                    | 58,668       |         |
| S64 | (TI meta analy* or AB meta analy*)                                        |                                    |              | 18,461  |
| S63 | (MH "Meta Analysis")                                                      |                                    | 17,583       |         |
| S62 | PT systematic review                                                      |                                    | 38,804       |         |

|     |                                                              |        |        |
|-----|--------------------------------------------------------------|--------|--------|
| S61 | (MH "Systematic Review")                                     | 26,076 |        |
| S60 | (S10 OR S14 OR S22 OR S26 OR S34 OR S41 OR S46 OR S59)       |        |        |
|     | 351,140                                                      |        |        |
| S59 | (S47 OR S48 OR S49 OR S50 OR S51 OR S52 OR S53 OR S54 OR S55 |        |        |
|     | OR S56 OR S57 OR S58)                                        | 21,664 |        |
| S58 | TX hib                                                       | 1,394  |        |
| S57 | TX "h. influenzae"                                           | 1,320  |        |
| S56 | TX (haemophilus influenzae OR haemophilus meningitis OR      |        |        |
|     | hemophilus influenzae OR hemophilus meningitis)              |        | 2,614  |
| S55 | TX (pertuss* OR whooping cough)                              | 5,258  |        |
| S54 | TX (diphtheria OR dtp OR dtap OR tdap)                       |        | 4,575  |
| S53 | TX tetanus                                                   | 5,620  |        |
| S52 | TX polio*                                                    | 7,967  |        |
| S51 | (MH "Poliomyelitis+")                                        | 2,137  |        |
| S50 | TX (rubella* OR german measles)                              | 5,292  |        |
| S49 | TX (epidemic parotiti* OR infectious parotiti*)              |        | 16     |
| S48 | TX mumps                                                     | 4,492  |        |
| S47 | TX (measles OR rubeola OR rubeolla)                          |        | 7,659  |
| S46 | (S42 OR S43 OR S44 OR S45)                                   | 35,833 |        |
| S45 | TX ltbi                                                      | 315    |        |
| S44 | TX tb                                                        | 20,924 |        |
| S43 | TX tuberculo*                                                | 22,046 |        |
| S42 | (MH "Tuberculosis")                                          | 6,869  |        |
| S41 | (S35 OR S36 OR S37 OR S38 OR S39 OR S40)                     |        | 2,852  |
| S40 | TX strongyloid*                                              | 233    |        |
| S39 | (MH "Helminthiasis+")                                        | 2,152  |        |
| S38 | TX katayama fever                                            | 9      |        |
| S37 | TX bilharzia*                                                | 82     |        |
| S36 | TX schistosom*                                               | 1,074  |        |
| S35 | (MH "Schistosomiasis+")                                      | 418    |        |
| S34 | S27 OR S28 OR S29 OR S30 OR S31 OR S32 OR S33                |        |        |
|     | 108,053                                                      |        |        |
| S33 | TX aids N2 (infect* or virus*)                               | 8,087  |        |
| S32 | MW aids                                                      | 18,755 |        |
| S31 | TX acquired N1 (immunodeficienc* or immune deficienc* or     |        |        |
|     | immunodeficienc* or immuno deficienc*)                       | 17,616 |        |
| S30 | (MH "Acquired Immunodeficiency Syndrome")                    |        | 11,846 |
| S29 | TX human N1 (immunodeficienc* or immune deficienc* or        |        |        |
|     | immunodeficienc* or immuno deficienc*)                       | 17,458 |        |
| S28 | TX (hiv or hiv1* or hiv2*)                                   | 92,725 |        |
| S27 | (MH "Human Immunodeficiency Virus+")                         |        | 4,228  |
| S26 | S23 OR S24 OR S25                                            | 16,479 |        |
| S25 | TX (hep or hepatitis) N3 C                                   |        | 14,430 |
| S24 | TX (CHC or HCV or HepC)                                      | 6,359  |        |
| S23 | (MH "Hepatitis C+")                                          | 6,858  |        |
| S22 | (S15 OR S16 OR S17 OR S18 OR S19 OR S20 OR S21)              |        |        |
|     | 14,773                                                       |        |        |
| S21 | TX (serum or type b) N2 hepatitis                            | 1,169  |        |
| S20 | TX hb-s-ag                                                   | 2      |        |
| S19 | TX hbs N2 ag                                                 | 31     |        |

|                                   |                                                                              |         |        |
|-----------------------------------|------------------------------------------------------------------------------|---------|--------|
| S18                               | TX hbsag                                                                     | 931     |        |
| S17                               | TX (hep or hepatitis) N3 B                                                   |         | 13,134 |
| S16                               | TX (CHB or HBV or HepB)                                                      | 4,353   |        |
| S15                               | (MH "Hepatitis B+")                                                          | 4,314   |        |
| S14                               | S11 OR S12 OR S13                                                            | 63,766  |        |
| S13                               | TX (communicable or contagious or transmissible) N2 (disease* or infection*) | 14,327  |        |
| S12                               | TX (infectious N2 disease*)                                                  |         | 54,715 |
| S11                               | (MH "Communicable Diseases")                                                 |         | 5,897  |
| S10                               | (S6 OR S7 OR S8 OR S9)                                                       | 176,323 |        |
| S9                                | TX (consumer* or patient*) N3 (accept* or attitud* or satisf*)               |         |        |
| N3 (care or health or healthcare) |                                                                              | 12,735  |        |
| S8                                | (MH "Patient Satisfaction")                                                  |         | 27,662 |
| S7                                | TX ((availab* or access* or barrier* or equit*) N3 (care or health*))        | 145,137 |        |
| S6                                | (MH "Health Services Accessibility+")                                        |         | 46,693 |
| S5                                | S1 OR S2 OR S3 OR S4                                                         | 56,420  |        |
| S4                                | TX (asylum N2 seek*) OR TX (asylum N2 sought)                                |         |        |
| 1,884                             |                                                                              |         |        |
| S3                                | TX (emigra* or immigra* or migrant* or migration* or newcomer* or refugee*)  | 56,050  |        |
| S2                                | (MH "Refugees")                                                              | 3,603   |        |
| S1                                | (MH "Transients and Migrants") or (MH Immigrants)                            |         |        |
| 9,514                             |                                                                              |         |        |

\*\*\*\*\*
